# Supplementary material for: pH-Taxis of Biohybrid Microsystems
Source: PubMed Central journal article supplement (PMC4466791; doi:10.1038/srep11403), 2015-06-15
Supplement: srep11403-s1.pdf [file srep11403-s1.pdf]

# pH-Taxis of Biohybrid Microsystems

Jiang Zhuang,<sup>1</sup> Rika Wright Carlsen,<sup>1,2</sup> and Metin Sitti<sup>1,3,\*</sup>

<sup>1</sup>Department of Mechanical Engineering, Carnegie Mellon University, Pittsburgh, PA 15213, USA

<sup>2</sup>Department of Engineering, Robert Morris University, Pittsburgh, PA 15108, USA

<sup>3</sup>Max Planck Institute for Intelligent Systems, Stuttgart 70569, Germany

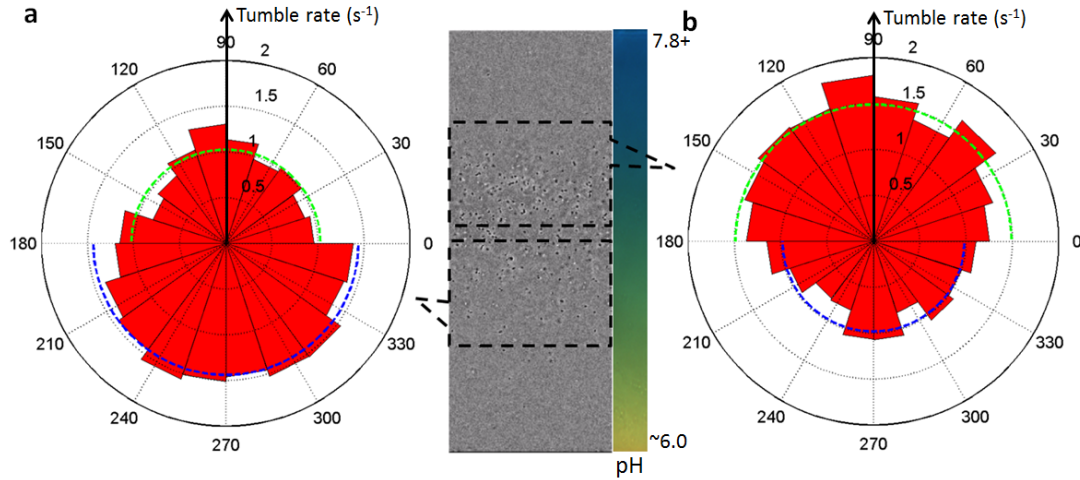

Fig. S1. **Bacterial tumble rate distribution (Gradient 1).** A phase contrast image of the bacterial distribution in the sample channel is shown in the middle; the image height corresponds to the full channel width. (a) Tumble rate distribution on the acidic side of optimal pH ( $\sim 7.0$ ). (b) Tumble rate distribution on the basic side of optimal pH. In both cases, the average tumble rate when bacteria move towards the optimal pH is around  $1.0 \text{ s}^{-1}$ , while it is around  $1.5 \text{ s}^{-1}$  when moving towards unfavored pH regions.

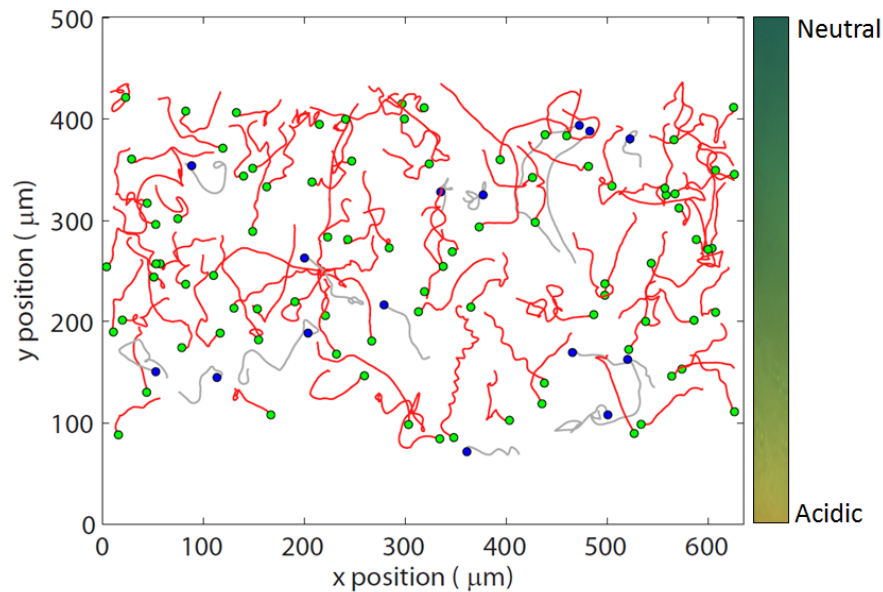

Fig. S2. **Sample swimming trajectories of microrobots.** The trajectories are randomly picked from microrobot samples undergoing unidirectional taxis away from an acidic pH condition (Gradient 2). The starting positions are marked by circles

\* sitti@is.mpg.de (corresponding author)

(green and blue); the red trajectories have net  $y$ -displacements from acidic to neutral pH, while the gray ones have net  $y$ -displacements from neutral to acidic pH.

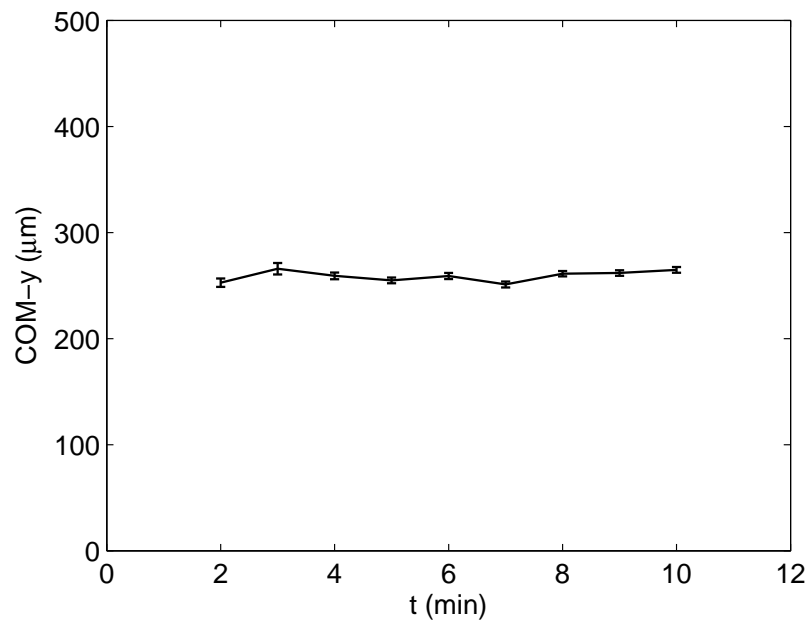

Fig. S3. **COM- $y$  of microbeads without bacteria attached under a pH gradient (Gradient 1).** Without attaching bacteria, COM- $y$  of the microbeads only fluctuates slightly around the mid-width of the channel, which reveals that there is no deterministic drifting for the bare microbeads under pH gradients. The error bar denotes the standard deviation of the COM- $y$  of the captured frames within the corresponding one minute interval.
